# Supplementary material
Source: PubMed Central journal article supplement (PMC6323014)
Supplement: 477606_1_En_99_MOESM2_ESM.pdf [file 477606_1_En_99_MOESM2_ESM.pdf]

**Supplemental Table S1. Amino acid profile of plasma in the NICCD period of the examined 20 affected children**

| <i>Urea cycle related amino acids</i> (μM) |                | <i>Ketogenic amino acids</i> (μM)      |              |
|--------------------------------------------|----------------|----------------------------------------|--------------|
| Urea                                       | 1765.7 ± 300.2 | Tyrosine                               | 89.9 ± 20.9  |
| Citrulline                                 | 130.2 ± 39.9   | Phenylalanine                          | 77.5 ± 24.8  |
| Arginine                                   | 127.4 ± 25.5   | Lysine                                 | 283.3 ± 29.6 |
| Ornithine                                  | 112.7 ± 27.4   | Tryptophan                             | 34.7 ± 10.5  |
| Aspartate                                  | 4.2 ± 2.2      | AAAs                                   | 167.4 ± 41.0 |
| Asparagine                                 | 47.9 ± 9.1     |                                        |              |
| Glutamate                                  | 58.8 ± 13.4    | <i>Branched-chain amino acids</i> (μM) |              |
| Glutamine                                  | 284.0 ± 40.6   | Leucine                                | 74.4 ± 11.4  |
|                                            |                | Isoleucine                             | 46.9 ± 8.7   |
| <i>Glucogenic amino acids</i> (μM)         |                | Valine                                 | 140.7 ± 32.7 |
| Glycine                                    | 187.8 ± 38.0   | BCAAs                                  | 262.0 ± 37.6 |
| Serine                                     | 148.7 ± 29.6   |                                        |              |
| Alanine                                    | 248.4 ± 45.2   | <i>Ratios</i>                          |              |
| Cystine                                    | 42.1 ± 6.9     | Fisher ratio                           | 1.6 ± 0.4    |
| Methionine                                 | 95.8 ± 55.7    | Thr/Ser                                | 2.0 ± 0.2    |
| Threonine                                  | 289.6 ± 42.7   | Cit/Ser                                | 0.9 ± 0.3    |
| Histidine                                  | 76.5 ± 19.8    | Cit/(Ile+Leu)                          | 1.1 ± 0.4    |

Data are presented as mean ± SD. BCAAs, the sum of valine, leucine and isoleucine; AAAs, the sum of phenylalanine and tyrosine; Fisher ratio, BCAAs/AAAs; Thr/Ser, the ratio of threonine to serine; Cit/Ser, the ratio of citrulline to serine; Cit/Ser, the ratio of citrulline to the sum of isoleucine and leucine.
